# Supplementary material for: Trophic redundancy reduces vulnerability to extinction cascades
Source: PubMed Central journal article supplement — Proc Natl Acad Sci U S A. 2018 Feb 21;115(10):2419–24. doi: 10.1073/pnas.1716825115 (PMC5878001; doi:10.1073/pnas.1716825115), 2018-02-21
Supplement: pnas.201716825SI.pdf [file pnas.201716825SI.pdf]

# Supporting Information

Sanders et al. 10.1073/pnas.1716825115

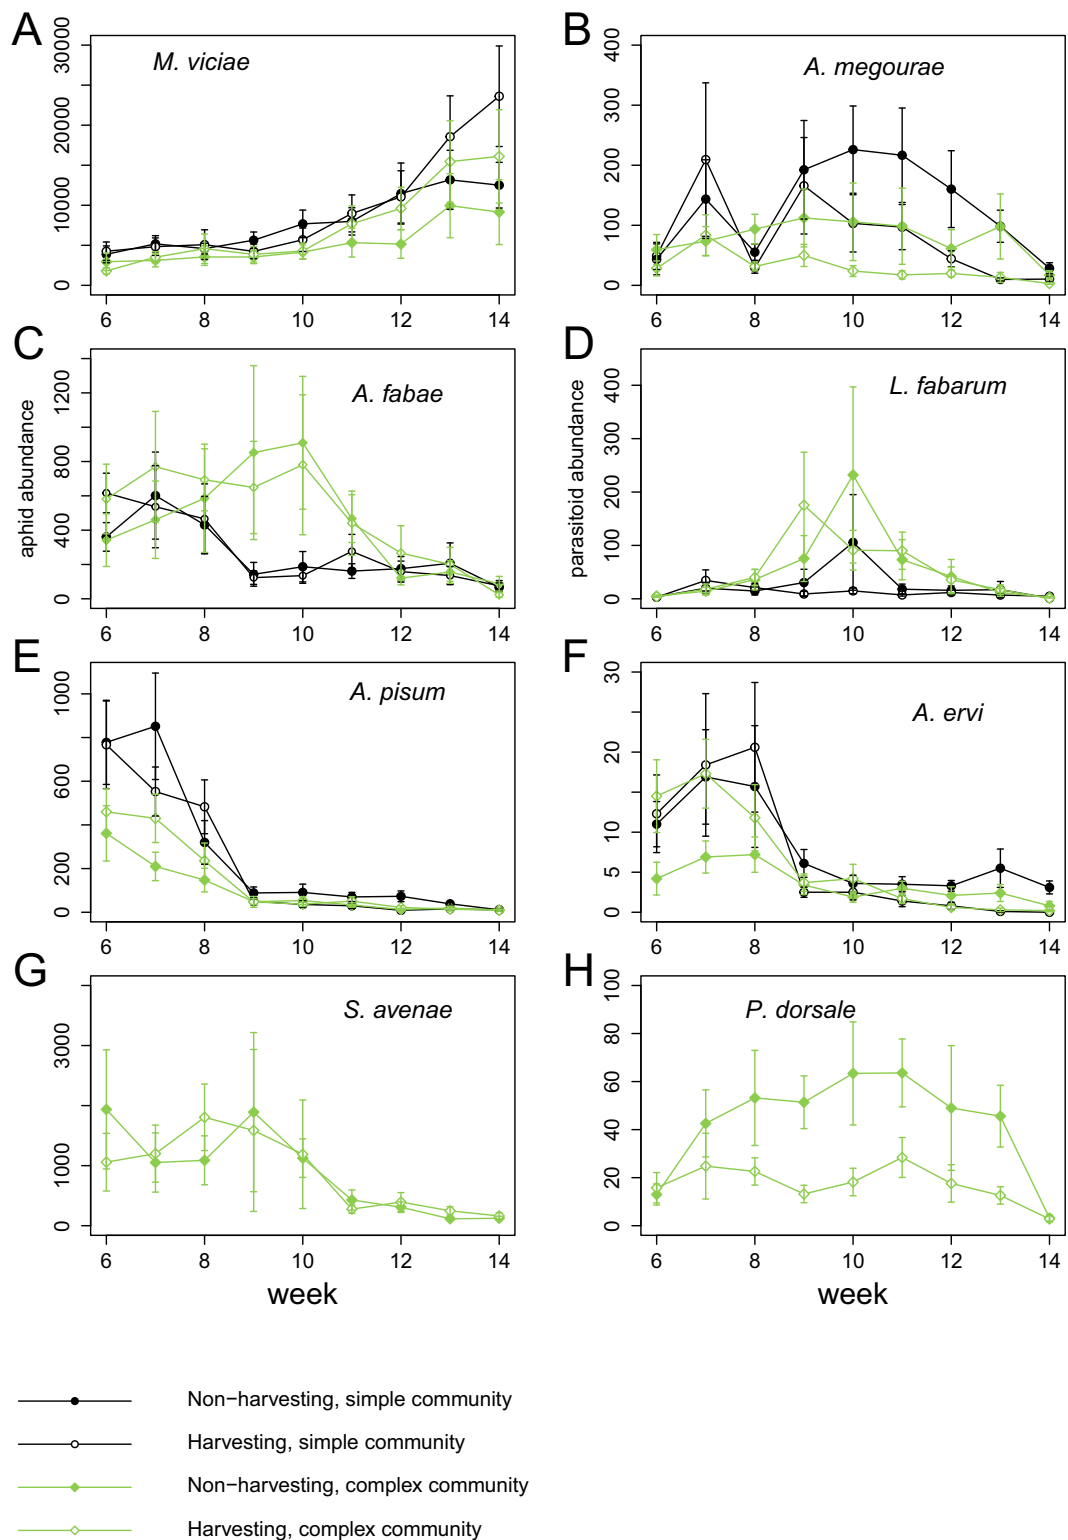

**Fig. S1.** Population dynamics for the experimental communities. The population dynamics for the aphids *Megoura viciae* (A), *Aphis fabae* (C), *Acyrtosiphon pisum* (E), and *Sitobion avenae* (G) and the parasitoids *Aphidius megourae* (B), *Lysiphlebus fabarum* (D), *Aphidius ervi* (F), and *Praon dorsale* (H) in simple (black, circle) and complex (green, diamond) communities with *A. megourae* harvested (open symbols) or nonharvested (closed symbols) are shown. Presented are means for species abundance and SEs (from 10 replicates). *A. ervi* densities decreased in harvesting treatments toward the end of the experiment (harvesting  $\times$  week:  $F_{1,317} = 22.72$ ,  $P < 0.0001$ ) and were stronger in the simpler communities (harvesting  $\times$  community:  $F_{1,27} = 9.07$ ,  $P = 0.0056$ ). *A. pisum* aphids had lower numbers in the complex community (community:  $F_{1,27} = 10.11$ ,  $P = 0.0037$ ) but were less affected by harvesting in these than in simple communities (harvesting  $\times$  community:  $F_{1,27} = 4.45$ ,  $P = 0.0443$ ). *L. fabarum* and *A. fabae* population dynamics were unaffected by treatments, and effects on all other species are discussed in the main text. Note the lower densities after fully established food webs that include top-down control through parasitoids and hyperparasitoids (species persistence is shown in Fig. 2).





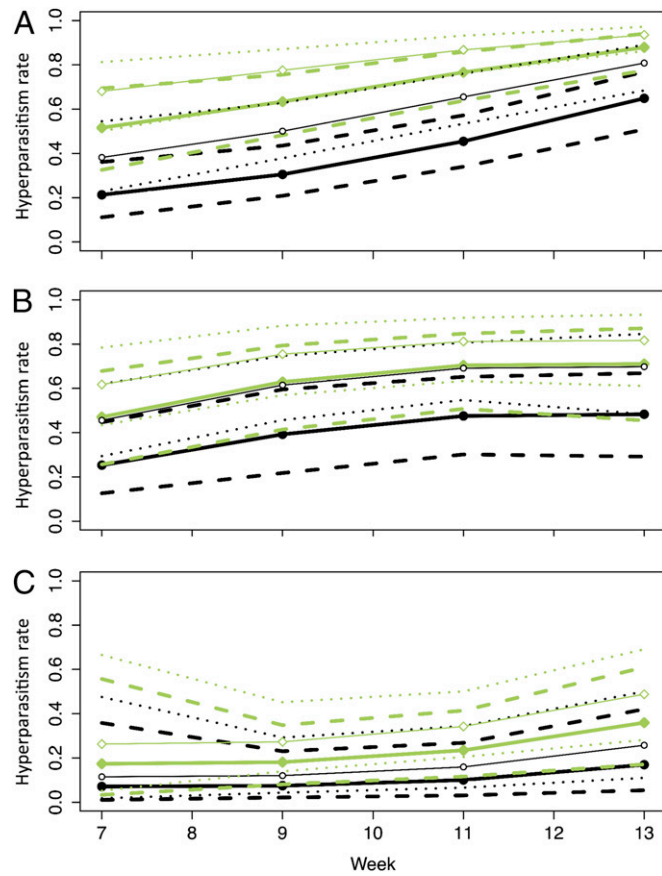

**Fig. S5.** Hyperparasitism rate for primary parasitoids. The hyperparasitism rates for *A. megourae* (A), *A. ervi* (B), and *L. fabarum* (C) as a result of attacks from the hyperparasitoid community (species are identified in legends for Figs. S3 and S4) in simple (black, circles) and complex (green, diamonds) communities with *A. megourae* either harvested (open symbols) or nonharvested (closed symbols) are shown. Presented are means for the proportion of parasitoid mummies that have been hyperparasitized and 95% confidence intervals (extracted from post hoc distribution).





**Table S2. Hyperparasitism rate for primary parasitoids**

| Species            | Harvesting |        | Community |         | Week |         |
|--------------------|------------|--------|-----------|---------|------|---------|
|                    | z          | P      | z         | P       | z    | P       |
| <i>A. megourae</i> | 2.81       | 0.0049 | 4.24      | <0.0001 | 4.62 | <0.0001 |
| <i>L. fabarum</i>  | 1.20       | 0.2302 | 1.843     | 0.0653  | 1.15 | 0.6057  |
| <i>A. ervi</i>     | 2.09       | 0.0370 | 2.04      | 0.0069  | 2.70 | 0.0069  |

Presented are the results from generalized linear mixed effects models (binomial error structure) with a combined variable (hyperparasitized and nonhyperparasitized aphid mummies) as a response variable and harvesting, community complexity, and week as fixed factors. Block and mesocosm were included as random factors.



**Table S3. Sets of parameter values used in the sensitivity analysis**

| Parameter ranges | $b_{min}$ | $b_{max}$ | $K_{min}$ | $K_{max}$ | $b_{Hmin}$ | $b_{Hmax}$ | $a_{Hmin}$ | $a_{Hmax}$ | $b_{Pmin}$ | $b_{Pmax}$ | $a_{Pmin}$ | $a_{Pmax}$ |
|------------------|-----------|-----------|-----------|-----------|------------|------------|------------|------------|------------|------------|------------|------------|
| Simulation 1     | 0.06      | 1.65      | 14.75     | 30.38     | -1.94      | -1.60      | 0.19       | 0.49       | -0.37      | -0.09      | 1.23       | 1.63       |
| Simulation 2     | 2.61      | 3.94      | 15.38     | 31.25     | -1.83      | -1.55      | 1.46       | 1.72       | -1.61      | -1.27      | 0.06       | 0.54       |
| Simulation 3     | 1.89      | 2.86      | 31.42     | 48.21     | -0.65      | -0.33      | 1.11       | 1.59       | -1.20      | -1.05      | 0.39       | 1.17       |
| Simulation 4     | 1.77      | 2.86      | 16.42     | 34.71     | -1.04      | -0.73      | 0.51       | 1.08       | -1.27      | -1.03      | 0.51       | 1.15       |
| Simulation 5     | 1.56      | 3.52      | 0.77      | 18.11     | -1.44      | -1.19      | 0.47       | 0.98       | -2.43      | -2.08      | 0.87       | 1.36       |
| Simulation 6     | 2.24      | 3.85      | 2.33      | 14.29     | -0.55      | -0.17      | 0.99       | 1.51       | -1.04      | -0.72      | 0.02       | 0.76       |
| Simulation 7     | 3.54      | 5.48      | 0.00      | 10.98     | -0.42      | -0.07      | 1.27       | 1.57       | -0.81      | -0.51      | 0.10       | 0.66       |
| Simulation 8     | 1.73      | 2.68      | 14.68     | 29.70     | -1.97      | -1.79      | 1.28       | 1.66       | -1.71      | -1.40      | 0.40       | 0.99       |
| Simulation 9     | 0.76      | 2.64      | 28.24     | 43.14     | -1.79      | -1.44      | 1.33       | 1.71       | -2.25      | -1.99      | 0.90       | 1.57       |
| Simulation 10    | 2.28      | 4.04      | 16.73     | 29.15     | -0.59      | -0.35      | 0.36       | 0.89       | -1.24      | -0.89      | 0.82       | 1.11       |
| Simulation 11    | 0.43      | 2.28      | 0.70      | 14.42     | -0.72      | -0.34      | 1.21       | 1.80       | -2.50      | -2.28      | 0.75       | 1.00       |
| Simulation 12    | 4.45      | 6.03      | 14.49     | 29.13     | -1.34      | -0.96      | 0.12       | 0.60       | -2.38      | -2.09      | 0.60       | 1.39       |
| Simulation 13    | 2.79      | 3.87      | 8.63      | 21.50     | -1.09      | -0.83      | 0.90       | 1.37       | -2.41      | -2.18      | 0.03       | 0.43       |
| Simulation 14    | 0.94      | 1.67      | 21.50     | 39.37     | -1.87      | -1.70      | 0.46       | 0.83       | -2.01      | -1.64      | 1.06       | 1.38       |
| Simulation 15    | 4.48      | 5.33      | 3.18      | 18.69     | -0.61      | -0.30      | 0.90       | 1.06       | -1.88      | -1.55      | 0.79       | 1.23       |
| Simulation 16    | 0.74      | 1.75      | 22.69     | 41.18     | -0.24      | -0.03      | 0.28       | 0.50       | -0.73      | -0.36      | 0.65       | 0.95       |
| Simulation 17    | 1.20      | 1.85      | 12.49     | 23.64     | -2.02      | -1.70      | 1.20       | 1.37       | -0.97      | -0.75      | 1.17       | 1.72       |
| Simulation 18    | 0.52      | 1.75      | 24.45     | 42.43     | -1.92      | -1.69      | 0.74       | 1.12       | -0.76      | -0.46      | 0.00       | 0.60       |
| Simulation 19    | 4.60      | 6.56      | 7.43      | 21.94     | -0.89      | -0.51      | 0.73       | 1.30       | -2.07      | -1.67      | 0.50       | 1.12       |
| Simulation 20    | 3.56      | 4.45      | 25.30     | 33.32     | -1.68      | -1.51      | 1.46       | 1.79       | -1.08      | -0.73      | 0.11       | 0.76       |
| Simulation 21    | 4.74      | 6.30      | 0.31      | 13.32     | -1.73      | -1.35      | 0.00       | 0.30       | -1.36      | -0.98      | 0.69       | 1.35       |
| Simulation 22    | 0.79      | 2.49      | 0.00      | 9.61      | -1.54      | -1.28      | 1.13       | 1.47       | -2.33      | -2.04      | 0.46       | 0.99       |
| Simulation 23    | 3.59      | 5.32      | 24.62     | 40.01     | -1.93      | -1.75      | 0.98       | 1.32       | -2.15      | -2.04      | 0.50       | 1.19       |
| Simulation 24    | 1.85      | 3.00      | 14.75     | 34.13     | -2.13      | -1.74      | 0.03       | 0.55       | -1.37      | -1.07      | 0.82       | 1.35       |
| Simulation 25    | 0.00      | 1.40      | 18.68     | 30.95     | -1.61      | -1.50      | 1.57       | 1.81       | -1.65      | -1.29      | 1.21       | 1.97       |
| Simulation 26    | 1.26      | 2.25      | 3.96      | 23.91     | -0.56      | -0.20      | 1.18       | 1.63       | -1.88      | -1.64      | 0.92       | 1.57       |
| Simulation 27    | 0.00      | 0.97      | 6.32      | 14.80     | -0.60      | -0.41      | 0.04       | 0.44       | -0.80      | -0.46      | 0.01       | 0.62       |
| Simulation 28    | 4.66      | 5.93      | 24.02     | 42.10     | -1.64      | -1.26      | 1.02       | 1.42       | -1.56      | -1.28      | 0.26       | 1.00       |
| Simulation 29    | 0.56      | 2.38      | 30.38     | 39.50     | -2.14      | -1.81      | 1.33       | 1.75       | -1.45      | -1.12      | 0.70       | 1.11       |
| Simulation 30    | 4.52      | 6.30      | 29.49     | 47.88     | -0.84      | -0.44      | 0.00       | 0.31       | -1.50      | -1.16      | 0.37       | 1.04       |
| Simulation 31    | 0.00      | 1.36      | 1.80      | 7.33      | -0.29      | -0.01      | 0.88       | 1.22       | -0.78      | -0.57      | 0.70       | 1.20       |
| Simulation 32    | 0.19      | 1.40      | 0.00      | 13.16     | -1.62      | -1.42      | 0.30       | 0.65       | -0.91      | -0.54      | 0.00       | 0.44       |
| Simulation 33    | 3.27      | 4.63      | 30.06     | 44.31     | -1.30      | -1.07      | 0.84       | 1.29       | -1.67      | -1.35      | 0.08       | 0.47       |
| Simulation 34    | 1.23      | 2.83      | 20.52     | 39.61     | -1.42      | -1.06      | 1.09       | 1.55       | -0.65      | -0.30      | 0.20       | 0.94       |
| Simulation 35    | 0.34      | 1.71      | 2.09      | 21.28     | -1.15      | -0.80      | 0.34       | 0.54       | -1.22      | -0.95      | 0.08       | 0.58       |
| Simulation 36    | 3.58      | 5.21      | 21.17     | 40.45     | -1.29      | -1.15      | 0.25       | 0.77       | -1.92      | -1.69      | 1.26       | 1.86       |
| Simulation 37    | 0.93      | 2.69      | 9.15      | 21.72     | -1.80      | -1.50      | 0.77       | 1.05       | -0.96      | -0.71      | 0.73       | 1.52       |
| Simulation 38    | 0.16      | 1.32      | 11.15     | 20.47     | -0.89      | -0.69      | 1.60       | 1.81       | -1.69      | -1.37      | 0.82       | 1.50       |
| Simulation 39    | 0.45      | 2.38      | 5.70      | 22.93     | -0.45      | -0.16      | 1.14       | 1.63       | -2.41      | -2.15      | 1.04       | 1.55       |
| Simulation 40    | 1.54      | 3.43      | 12.42     | 19.96     | -2.05      | -1.78      | 0.46       | 1.03       | -0.87      | -0.67      | 0.15       | 0.88       |
| Simulation 41    | 2.62      | 4.15      | 20.78     | 32.59     | -1.13      | -0.86      | 0.91       | 1.32       | -1.13      | -0.95      | 1.09       | 1.56       |
| Simulation 42    | 3.86      | 5.84      | 27.10     | 32.28     | -0.99      | -0.63      | 1.56       | 2.03       | -0.97      | -0.61      | 0.00       | 0.46       |
| Simulation 43    | 2.80      | 4.20      | 9.35      | 15.52     | -1.24      | -1.01      | 0.05       | 0.49       | -0.54      | -0.37      | 0.10       | 0.48       |
| Simulation 44    | 3.58      | 4.20      | 0.00      | 11.62     | -0.43      | -0.14      | 1.41       | 1.70       | -2.11      | -2.00      | 1.19       | 1.73       |
| Simulation 45    | 5.16      | 6.78      | 1.97      | 15.41     | -1.11      | -0.95      | 0.98       | 1.22       | -0.86      | -0.55      | 1.18       | 1.98       |
| Simulation 46    | 5.49      | 6.01      | 12.61     | 24.26     | -1.45      | -1.06      | 0.41       | 0.81       | -2.54      | -2.19      | 0.30       | 1.00       |
| Simulation 47    | 1.19      | 2.99      | 27.14     | 43.48     | -1.49      | -1.18      | 1.10       | 1.27       | -0.38      | 0.00       | 0.17       | 0.79       |
| Simulation 48    | 1.30      | 3.22      | 10.36     | 23.52     | -2.09      | -1.70      | 0.41       | 0.91       | -1.94      | -1.75      | 0.00       | 0.50       |
| Simulation 49    | 3.14      | 4.08      | 13.79     | 21.58     | -0.96      | -0.70      | 0.03       | 0.48       | -1.74      | -1.46      | 0.69       | 1.39       |
| Simulation 50    | 2.87      | 4.58      | 0.83      | 10.54     | -1.91      | -1.58      | 0.32       | 0.73       | -2.27      | -2.02      | 0.37       | 0.80       |
| Simulation 51    | 0.17      | 0.75      | 20.42     | 27.71     | -0.93      | -0.53      | 0.39       | 0.97       | -1.17      | -1.04      | 0.00       | 0.52       |
| Simulation 52    | 3.93      | 5.42      | 0.00      | 14.14     | -0.65      | -0.44      | 0.74       | 0.96       | -1.56      | -1.24      | 1.15       | 1.94       |
| Simulation 53    | 4.10      | 5.94      | 28.15     | 47.72     | -1.46      | -1.14      | 1.37       | 1.97       | -0.64      | -0.50      | 1.00       | 1.77       |
| Simulation 54    | 5.37      | 6.24      | 0.30      | 15.57     | -1.75      | -1.40      | 0.43       | 0.99       | -0.47      | -0.31      | 0.96       | 1.32       |
| Simulation 55    | 3.71      | 4.74      | 15.92     | 26.20     | -1.88      | -1.54      | 0.76       | 1.24       | -2.15      | -1.77      | 0.32       | 0.77       |
| Simulation 56    | 2.59      | 3.84      | 4.13      | 16.25     | -1.10      | -0.78      | 0.59       | 1.14       | -0.32      | -0.09      | 1.03       | 1.67       |
| Simulation 57    | 3.69      | 5.55      | 9.20      | 25.42     | -0.39      | -0.25      | 1.04       | 1.36       | -2.40      | -2.02      | 0.00       | 0.35       |
| Simulation 58    | 1.39      | 2.57      | 1.71      | 10.41     | -2.16      | -1.82      | 0.00       | 0.40       | -0.52      | -0.21      | 0.16       | 0.77       |
| Simulation 59    | 1.52      | 2.32      | 21.19     | 35.18     | -1.30      | -0.92      | 1.06       | 1.61       | -1.93      | -1.63      | 1.18       | 1.86       |
| Simulation 60    | 4.57      | 5.69      | 26.18     | 45.94     | -0.79      | -0.64      | 1.54       | 1.74       | -1.56      | -1.42      | 0.70       | 1.25       |
| Simulation 61    | 3.45      | 5.23      | 0.42      | 19.21     | -1.49      | -1.29      | 0.10       | 0.65       | -0.70      | -0.34      | 0.69       | 1.03       |
| Simulation 62    | 1.98      | 3.33      | 24.24     | 41.14     | -0.66      | -0.51      | 0.72       | 1.21       | -0.36      | -0.23      | 0.54       | 0.96       |
| Simulation 63    | 3.33      | 4.00      | 0.00      | 18.36     | -0.39      | -0.07      | 0.29       | 0.83       | -0.36      | -0.19      | 0.93       | 1.21       |



**Table S3. Cont.**

| Parameter ranges | $b_{min}$ | $b_{max}$ | $K_{min}$ | $K_{max}$ | $b_{Hmin}$ | $b_{Hmax}$ | $a_{Hmin}$ | $a_{Hmax}$ | $b_{Pmin}$ | $b_{Pmax}$ | $a_{Pmin}$ | $a_{Pmax}$ |
|------------------|-----------|-----------|-----------|-----------|------------|------------|------------|------------|------------|------------|------------|------------|
| Simulation 64    | 5.19      | 6.64      | 13.25     | 27.37     | -1.83      | -1.44      | 0.92       | 1.42       | -1.07      | -0.87      | 0.20       | 0.92       |
| Simulation 65    | 0.00      | 1.46      | 4.10      | 22.28     | -0.96      | -0.58      | 0.70       | 0.96       | -2.08      | -1.71      | 1.02       | 1.65       |
| Simulation 66    | 0.89      | 2.28      | 27.18     | 41.95     | -0.73      | -0.63      | 0.80       | 1.36       | -0.99      | -0.86      | 1.17       | 1.39       |
| Simulation 67    | 4.30      | 5.84      | 11.31     | 27.06     | -0.80      | -0.44      | 1.50       | 2.01       | -2.10      | -1.91      | 0.88       | 1.64       |
| Simulation 68    | 3.20      | 4.92      | 31.26     | 37.12     | -1.64      | -1.37      | 0.41       | 0.78       | -1.35      | -1.13      | 0.00       | 0.57       |
| Simulation 69    | 0.00      | 1.86      | 0.00      | 13.74     | -1.03      | -0.66      | 0.72       | 1.07       | -0.67      | -0.33      | 0.00       | 0.57       |
| Simulation 70    | 4.19      | 6.18      | 29.05     | 38.57     | -1.25      | -0.86      | 1.54       | 2.01       | -2.10      | -1.78      | 0.68       | 1.16       |
| Simulation 71    | 2.60      | 4.51      | 10.90     | 22.22     | -1.63      | -1.34      | 0.67       | 1.23       | -0.92      | -0.71      | 0.38       | 1.10       |
| Simulation 72    | 0.00      | 1.39      | 13.58     | 26.30     | -1.04      | -0.76      | 0.00       | 0.46       | -2.27      | -1.88      | 0.20       | 0.71       |
| Simulation 73    | 2.50      | 3.70      | 17.17     | 24.20     | -1.51      | -1.20      | 0.16       | 0.75       | -1.51      | -1.24      | 0.77       | 1.00       |
| Simulation 74    | 1.40      | 2.90      | 6.91      | 20.21     | -1.39      | -1.02      | 0.21       | 0.64       | -1.75      | -1.50      | 1.04       | 1.58       |
| Simulation 75    | 4.58      | 6.13      | 16.30     | 34.07     | -1.55      | -1.38      | 0.59       | 1.17       | -0.55      | -0.26      | 0.48       | 1.06       |
| Simulation 76    | 3.05      | 3.83      | 18.36     | 33.51     | -0.35      | -0.07      | 0.00       | 0.46       | -1.35      | -1.04      | 0.08       | 0.77       |
| Simulation 77    | 3.47      | 4.76      | 28.12     | 47.01     | -1.83      | -1.63      | 0.57       | 1.06       | -1.55      | -1.16      | 0.24       | 0.57       |
| Simulation 78    | 2.12      | 3.86      | 13.41     | 24.22     | -0.32      | -0.06      | 1.17       | 1.70       | -1.46      | -1.07      | 0.42       | 0.78       |
| Simulation 79    | 0.47      | 1.91      | 0.00      | 14.43     | -0.40      | -0.28      | 0.51       | 1.05       | -1.82      | -1.47      | 1.06       | 1.32       |
| Simulation 80    | 3.91      | 5.22      | 19.38     | 35.49     | -0.37      | -0.16      | 1.10       | 1.64       | -0.52      | -0.16      | 1.08       | 1.66       |
| Simulation 81    | 3.29      | 5.28      | 19.07     | 38.06     | -0.57      | -0.22      | 1.54       | 1.90       | -1.74      | -1.41      | 0.13       | 0.86       |
| Simulation 82    | 3.76      | 4.58      | 24.37     | 38.75     | -1.89      | -1.76      | 0.00       | 0.26       | -2.12      | -1.72      | 0.18       | 0.55       |
| Simulation 83    | 5.01      | 5.92      | 11.06     | 28.07     | -0.83      | -0.49      | 0.07       | 0.38       | -1.87      | -1.60      | 0.30       | 1.06       |
| Simulation 84    | 2.11      | 3.42      | 29.97     | 46.65     | -1.52      | -1.22      | 0.90       | 1.17       | -2.16      | -1.80      | 0.34       | 0.90       |
| Simulation 85    | 0.43      | 1.50      | 35.31     | 43.56     | -0.55      | -0.32      | 0.02       | 0.60       | -2.15      | -1.91      | 1.37       | 1.58       |
| Simulation 86    | 4.46      | 5.01      | 7.11      | 17.02     | -1.55      | -1.31      | 0.97       | 1.56       | -2.45      | -2.19      | 0.00       | 0.73       |
| Simulation 87    | 2.86      | 4.69      | 33.57     | 44.55     | -1.22      | -0.93      | 0.44       | 0.95       | -2.48      | -2.21      | 0.82       | 1.29       |
| Simulation 88    | 4.90      | 6.37      | 18.29     | 35.84     | -1.39      | -1.17      | 1.32       | 1.59       | -0.42      | -0.09      | 1.03       | 1.38       |
| Simulation 89    | 5.34      | 6.04      | 2.59      | 20.04     | -1.05      | -0.68      | 1.42       | 1.89       | -0.51      | -0.13      | 1.35       | 1.62       |
| Simulation 90    | 3.10      | 4.57      | 24.58     | 31.05     | -0.24      | -0.10      | 1.45       | 2.03       | -0.30      | -0.02      | 0.00       | 0.44       |
| Simulation 91    | 1.75      | 3.44      | 11.70     | 31.18     | -0.81      | -0.69      | 0.96       | 1.51       | -0.80      | -0.69      | 0.84       | 1.50       |
| Simulation 92    | 2.19      | 3.23      | 25.56     | 32.31     | -0.54      | -0.29      | 1.29       | 1.68       | -0.55      | -0.31      | 0.19       | 0.87       |
| Simulation 93    | 1.86      | 3.79      | 0.00      | 9.18      | -0.72      | -0.49      | 0.37       | 0.61       | -1.07      | -0.83      | 0.00       | 0.63       |
| Simulation 94    | 0.45      | 1.71      | 28.16     | 44.72     | -0.72      | -0.41      | 0.49       | 1.03       | -2.25      | -2.08      | 0.71       | 1.16       |
| Simulation 95    | 4.08      | 5.50      | 3.47      | 22.16     | -1.00      | -0.84      | 0.33       | 0.76       | -1.86      | -1.47      | 0.37       | 0.96       |
| Simulation 96    | 2.00      | 3.87      | 13.85     | 33.52     | -2.08      | -1.82      | 1.37       | 1.78       | -0.67      | -0.51      | 1.14       | 1.66       |
| Simulation 97    | 1.98      | 3.78      | 25.96     | 36.42     | -1.32      | -1.01      | 1.51       | 1.70       | -1.18      | -0.80      | 0.74       | 1.45       |
| Simulation 98    | 5.10      | 6.62      | 21.27     | 31.36     | -1.27      | -0.91      | 0.36       | 0.79       | -1.89      | -1.49      | 1.20       | 1.63       |
| Simulation 99    | 1.49      | 2.24      | 2.73      | 11.64     | -1.18      | -0.85      | 0.18       | 0.63       | -1.40      | -1.22      | 1.16       | 1.91       |
| Simulation 100   | 4.13      | 5.79      | 31.49     | 42.13     | -1.80      | -1.54      | 0.14       | 0.51       | -1.11      | -0.92      | 1.35       | 1.66       |

For each of 100 simulations, model parameters were drawn from the following uniform distributions:  $b_i$  from  $[b_{min}; b_{max}]$ ,  $[b_{Hmin}; b_{Hmax}]$ , and  $[b_{Pmin}; b_{Pmax}]$  for plants, herbivores, and predators/parasitoids, respectively;  $a_i$  from  $[a_{Hmin}; a_{Hmax}]$  and  $[a_{Pmin}; a_{Pmax}]$  for the per capita effects of herbivores and predators/parasitoids, respectively; and  $K_i$  from  $[K_{min}; K_{max}]$ . Rows in gray correspond to simulations where parameter values do not allow species coexistence in all food web scenarios. Such simulations are thus not included in Fig. S7. Minimum (*min*) and maximum (*max*) parameter values of  $b$  = intrinsic growth rate, and  $a$  = per capita effect of one species on the per capita growth rate of another species.  $K$  is plant species carrying capacity. Values are for plants, herbivores ( $H$ ), and predators/parasitoids ( $P$ ).

## Other Supporting Information Files

[Dataset S1 \(XLS\)](#)

[Dataset S2 \(XLS\)](#)

[Dataset S3 \(XLS\)](#)
